# Supplementary material for: The Antimicrobial Properties of PdII− and RuII−pyta Complexes
Source: PubMed Central journal article supplement (PMC10947176; doi:10.1002/cbic.202300247), 2023-09-05
Supplement: CBIC-24-0-s001.pdf [file CBIC-24-0-s001.pdf]

# ChemBioChem

Supporting Information

## The Antimicrobial Properties of Pd<sup>II</sup>– and Ru<sup>II</sup>–pyta Complexes

Annick van Niekerk,\* M. Cassiem Joseph, Angela Kavanagh, Hue Dinh, Andrew J. Swarts, Selwyn F. Mapolie, Johannes Zuegg, Amy K. Cain, Alysha G. Elliott, Mark A. T. Blaskovich, and Angelo Frei\*

## Preliminary antimicrobial screening against the ESKAPE pathogens.

Table S1: The results from the preliminary screening of the pyta complexes at a single concentration against a selection of bacteria and fungi.

| Compound name | Percentage growth inhibition*     |                              |                                   |                                    |                                     |                              |                                     |
|---------------|-----------------------------------|------------------------------|-----------------------------------|------------------------------------|-------------------------------------|------------------------------|-------------------------------------|
|               | Bacteria (Gram+)                  | Bacteria (Gram-)             |                                   |                                    |                                     | Fungi                        |                                     |
|               | <i>Staphylococcus aureus</i> (Sa) | <i>Escherichia coli</i> (Ec) | <i>Klebsiella pneumoniae</i> (Kp) | <i>Pseudomonas aeruginosa</i> (Pa) | <i>Acinetobacter baumannii</i> (Ab) | <i>Candida albicans</i> (Ca) | <i>Cryptococcus neoformans</i> (Cn) |
|               | ATCC 4330                         | ATCC 25922                   | ATCC 700603                       | ATCC 27853                         | ATCC 19606                          | ATCC 90028                   | ATCC 208821                         |
| <b>Pd1</b>    | 97.99                             | 18.2                         | 18.38                             | -6.42                              | 63.33                               | 105.36                       | 114.35                              |
| <b>Pd2</b>    | 3.61                              | 29.08                        | 20.37                             | 15.76                              | 58.21                               | 95.63                        | 105.2                               |
| <b>Pd3</b>    | -26.8                             | 25.43                        | 22.15                             | 15.24                              | 41.22                               | 108.47                       | 120.58                              |
| <b>Pd4</b>    | 66.52                             | 40.95                        | 17.85                             | 11.01                              | 32.96                               | 101.07                       | 100                                 |
| <b>Pd5</b>    | 53.27                             | 43.8                         | 19.15                             | 13.14                              | 53.7                                | 104.4                        | 109.56                              |
| <b>Pd6</b>    | 91.29                             | 0.13                         | 1.36                              | 8.12                               | 30.87                               | 4.01                         | 7.66                                |
| <b>Pd7</b>    | -6.64                             | 18.88                        | 13.04                             | 18.83                              | 35.6                                | 95.75                        | 135.76                              |
| <b>Pd8</b>    | -44.67                            | 14.06                        | 17.03                             | 15.66                              | 26.14                               | 99.74                        | 106.65                              |
| <b>Pd9</b>    | -0.14                             | 11.53                        | 11.6                              | 10.09                              | 34.41                               | 94.84                        | 103.95                              |
| <b>Pd10</b>   | 11.66                             | 31.24                        | 29.94                             | 73.72                              | 42.63                               | 96.63                        | 127.08                              |
| <b>Pd11</b>   | -7.55                             | 31.76                        | 16.11                             | 15.72                              | 49.84                               | 97.45                        | 105.65                              |
| <b>Ru1</b>    | -9.41                             | -1.21                        | 6.15                              | 7.15                               | 5.76                                | 62.11                        | -36.56                              |
| <b>Ru2</b>    | 45.94                             | 17.72                        | 10.36                             | 1.96                               | 42.93                               | 99.71                        | -40.12                              |
| <b>Ru3</b>    | -20.72                            | -1.06                        | 4.1                               | 8.91                               | 6.35                                | 82.95                        | -20.48                              |
| <b>Ru4</b>    | 98.27                             | 34.53                        | 18.32                             | 14.42                              | 44.63                               | 5.99                         | 106.99                              |
| <b>Ru5</b>    | -19.55                            | 6.55                         | 6.67                              | 11.3                               | 24.68                               | 4                            | -17.88                              |
| <b>Ru6</b>    | 97.04                             | 12.16                        | 13.38                             | 14.77                              | 35.28                               | 6.66                         | 102.49                              |
| <b>Ru7</b>    | -16.84                            | 11.67                        | 12.42                             | 18.83                              | 35.24                               | 5.33                         | -26.6                               |

\* Initial screening was performed at compound concentrations of 32.00 µg/mL. The percentage growth rate was calculated relative to the negative control (media only), therefore negative values indicate bacterial growth in the presence of the compounds.

## MIC determination, cytotoxicity, and Haemolysis determination

Table S2: The MIC values of the complexes evaluated against the ESKAPE pathogens as well as the human embryonic kidney cells (HEK-293) and human red blood cells (RBC) to assess the cytotoxicity and haemolytic properties of the compounds.

|            | Minimum inhibition concentration (µg/mL) |                  |     |     |     |       |       |         |     |
|------------|------------------------------------------|------------------|-----|-----|-----|-------|-------|---------|-----|
|            | Bacteria (Gram+)                         | Bacteria (Gram-) |     |     |     | Fungi |       | HEK-293 | RBC |
|            | Sa                                       | Ec               | Kp  | Pa  | Ab  | Ca    | Cn    | Hk      | Hm  |
| <b>Pd1</b> | 32                                       | >32              | >32 | >32 | >32 | 2     | 0.5   | 32      | >32 |
| <b>Pd2</b> | >32                                      | >32              | >32 | >32 | >32 | ≤0.25 | ≤0.25 | >32     | >32 |
| <b>Pd3</b> | >32                                      | >32              | >32 | >32 | >32 | 16    | 0.5   | >32     | >32 |
| <b>Pd4</b> | >32                                      | >32              | >32 | >32 | >32 | 2     | ≤0.25 | >32     | >32 |
| <b>Pd5</b> | >32                                      | >32              | >32 | >32 | >32 | ≤0.25 | 1     | >32     | >32 |
| <b>Pd6</b> | >32                                      | >32              | >32 | >32 | >32 | >32   | >32   | >32     | >32 |
| <b>Pd7</b> | >32                                      | >32              | >32 | >32 | >32 | ≤0.25 | ≤0.25 | >32     | >32 |
| <b>Pd8</b> | >32                                      | >32              | >32 | >32 | >32 | ≤0.25 | ≤0.25 | >32     | >32 |

|             |        |     |     |     |     |        |        |     |     |
|-------------|--------|-----|-----|-----|-----|--------|--------|-----|-----|
| <b>Pd9</b>  | >32    | >32 | >32 | >32 | >32 | <=0.25 | <=0.25 | >32 | >32 |
| <b>Pd10</b> | <=0.25 | >32 | >32 | >32 | >32 | <=0.25 | <=0.25 | >32 | >32 |
| <b>Pd11</b> | >32    | >32 | >32 | >32 | >32 | <=0.25 | <=0.25 | >32 | >32 |
| <b>Ru2</b>  | >32    | >32 | >32 | >32 | >32 | >32    | >32    | >32 | >32 |
| <b>Ru3</b>  | >32    | >32 | >32 | >32 | >32 | >32    | >32    | >32 | >32 |
| <b>Ru4</b>  | 32     | >32 | >32 | >32 | >32 | >32    | 8      | 32  | >32 |
| <b>Ru6</b>  | >32    | >32 | >32 | >32 | >32 | >32    | >32    | >32 | >32 |
| <b>Ru7</b>  | >32    | >32 | >32 | >32 | >32 | >32    | >32    | >32 | >32 |

## MIC ( $\mu\text{M}$ ) against the extended fungal panel

Table S3: The MIC ( $\mu\text{M}$ ) concentrations of the compounds evaluated against the extended fungal panel.

| Compound name | MIC ( $\mu\text{M}$ )   |                                |                           |                         |                                   |                      |
|---------------|-------------------------|--------------------------------|---------------------------|-------------------------|-----------------------------------|----------------------|
|               | <i>Candida albicans</i> | <i>Cryptococcus neoformans</i> | <i>Candida tropicalis</i> | <i>Candida glabrata</i> | <i>Cryptococcus deuterogattii</i> | <i>Candida auris</i> |
|               | ATCC 90028              | ATCC 208821                    | ATCC 750                  | ATCC 90030              | ATCC 32609                        | CBS10913             |
| <b>Pd1</b>    | 0.602 - 1.20            | 0.301                          | 0.301                     | 0.144 - 0.301           | 0.602                             | 0.0722 - 0.301       |
| <b>Pd2</b>    | <0.659                  | <0.659                         | 2.64                      | 42.2                    | 0.0422                            | 0.659                |
| <b>Pd3</b>    | 40.5                    | 1.27                           | n.d.                      | n.d.                    | n.d.                              | n.d.                 |
| <b>Pd4</b>    | 1.12 - 4.47             | 0.280 - 0.559                  | 1.12 - 2.24               | 2.24 - 4.47             | 0.559 - 2.24                      | 0.13 - 2.24          |
| <b>Pd5</b>    | 9.32 - 18.6             | 1.16 - 2.33                    | 18.6 - 37.3               | 18.6 - 37.3             | 4.66 - 9.32                       | 4.66 - 9.32          |
| <b>Pd6</b>    | >69.4                   | >69.4                          | n.d.                      | n.d.                    | n.d.                              | n.d.                 |
| <b>Pd7</b>    | 0.478 - 1.91            | <0.478                         | 1.91                      | 0.956 - 1.91            | 0.956 - 1.91                      | 0.956 - 1.91         |
| <b>Pd8</b>    | 0.837 - 1.67            | 0.100 - 0.435                  | 0.837                     | 1.67 - 3.35             | 0.418 - 0.837                     | 0.418 - 1.67         |
| <b>Pd9</b>    | 0.817 - 1.63            | 0.204                          | 0.817 - 1.63              | 0.817 - 3.27            | 0.409 - 0.817                     | 0.817 - 3.27         |
| <b>Pd10</b>   | 0.371 - 1.48            | 0.371                          | 0.742 - 1.48              | 0.742 - 2.97            | 0.742 - 2.97                      | 0.742 - 2.97         |
| <b>Pd11</b>   | 3.78 - 7.55             | 1.89                           | 3.78 - 7.55               | 15.1                    | 3.78                              | 1.89 - 7.55          |
| fluconazole   | 0.816 - 1.63            | 26.1                           | 13.1                      | >104                    | >104                              | >104                 |

## In vivo toxicity evaluation

Table S4: The results from the in vivo toxicity studies in *G. mellonella* larvae.

| Compound name           | Concentration in 2% DMSO | Toxicity result (1) | Concentration in 10% |                          |
|-------------------------|--------------------------|---------------------|----------------------|--------------------------|
|                         |                          |                     | DMSO                 | Toxicity test result (2) |
| <b>Pd4</b>              | 40 $\mu\text{M}$         | Non-toxic           | 100 $\mu\text{M}$    | Non-toxic                |
| <b>Pd5</b>              | 10 $\mu\text{M}$         | Non-toxic           | 100 $\mu\text{M}$    | Non-toxic                |
| <b>Pd6</b>              | 160 $\mu\text{M}$        | Non-toxic           | 1000 $\mu\text{M}$   | Non-toxic                |
| <b>Pd7</b>              | 20 $\mu\text{M}$         | Non-toxic           | 100 $\mu\text{M}$    | Non-toxic                |
| <b>Pd8</b>              | 20 $\mu\text{M}$         | Non-toxic           | 100 $\mu\text{M}$    | Non-toxic                |
| <b>Pd9</b>              | 160 $\mu\text{M}$        | Non-toxic           | 1000 $\mu\text{M}$   | Non-toxic                |
| <b>Pd10<sup>a</sup></b> | NA                       | NA                  | NA                   | NA                       |

|             |            |           |             |           |
|-------------|------------|-----------|-------------|-----------|
| <b>Pd11</b> | 40 $\mu$ M | Non-toxic | 100 $\mu$ M | Non-toxic |
| DMSO        | 2%         | Non-toxic | 10%         | Non-toxic |

<sup>a</sup> The complex did not fully dissolve at the concentrations tested and was therefore not injected into the larvae.

## Stability of Pd4 in DMSO

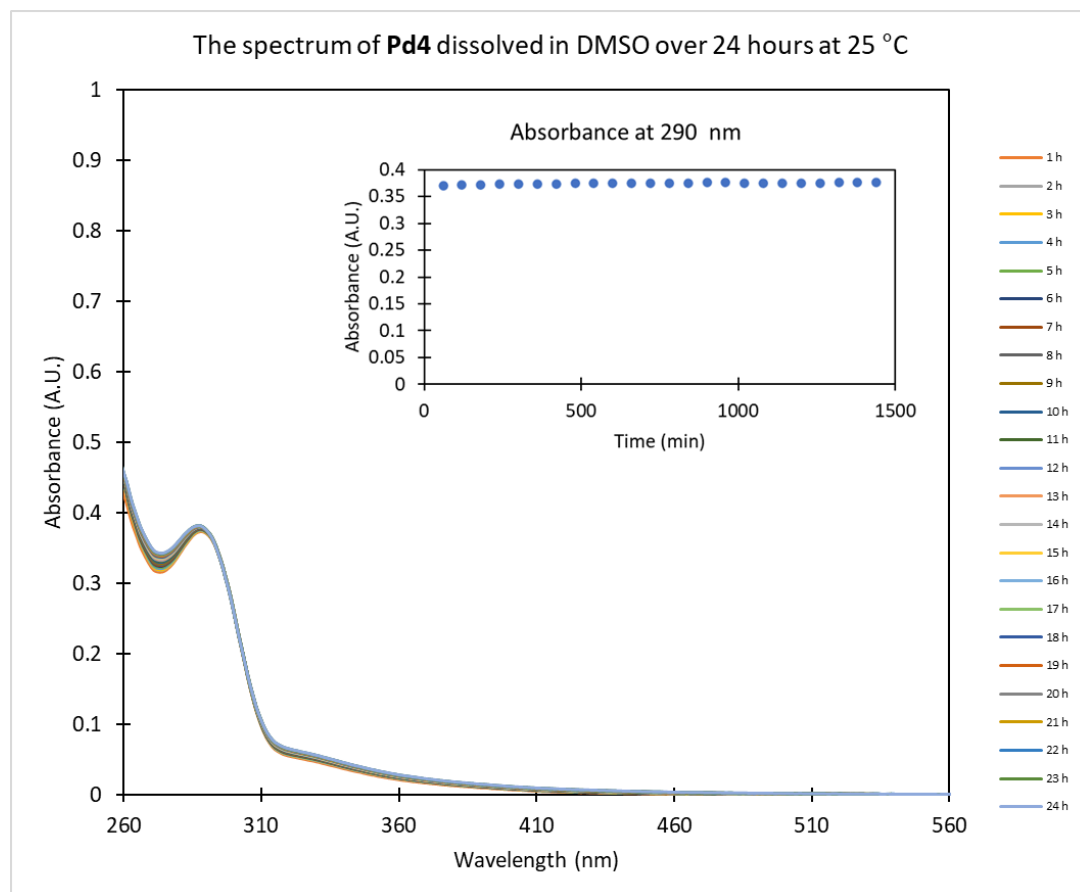

Figure S1: The stability of Pd4 in DMSO measured over time using the UV-vis spectroscopy.

Table S4: The MIC ( $\mu$ M) concentrations of the ligands and starting palladium compound evaluated against the extended fungal panel.

| Compound name | MIC ( $\mu$ M)          |                                |                           |                         |                                   |                      |
|---------------|-------------------------|--------------------------------|---------------------------|-------------------------|-----------------------------------|----------------------|
|               | <i>Candida albicans</i> | <i>Cryptococcus neoformans</i> | <i>Candida tropicalis</i> | <i>Candida glabrata</i> | <i>Cryptococcus deuterogattii</i> | <i>Candida auris</i> |
|               | ATCC 90028              | ATCC 208821                    | ATCC 750                  | ATCC 90030              | ATCC 32609                        | CBS10913             |
| L1            | >32.0                   | >32.0                          | >32.0                     | >32.0                   | >32.0                             | >32.0                |
| L2            | >32.0                   | >32.0                          | >32.0                     | >32.0                   | >32.0                             | 2.00                 |
| L4            | >16.0                   | >16.0                          | >16.0                     | >16.0                   | >16.0                             | >16.0                |
| L5            | >32.0                   | >32.0                          | >32.0                     | >32.0                   | >32.0                             | >32.0                |
| L6            | >32.0                   | >32.0                          | >32.0                     | >32.0                   | >32.0                             | >32.0                |
| L7            | >32.0                   | >32.0                          | >32.0                     | >32.0                   | >32.0                             | >32.0                |

|             |              |       |       |       |       |       |
|-------------|--------------|-------|-------|-------|-------|-------|
| <b>L8</b>   | >32.0        | >32.0 | >32.0 | >32.0 | >32.0 | >32.0 |
| fluconazole | 0.816 - 1.63 | 26.1  | 13.1  | >104  | >104  | >104  |

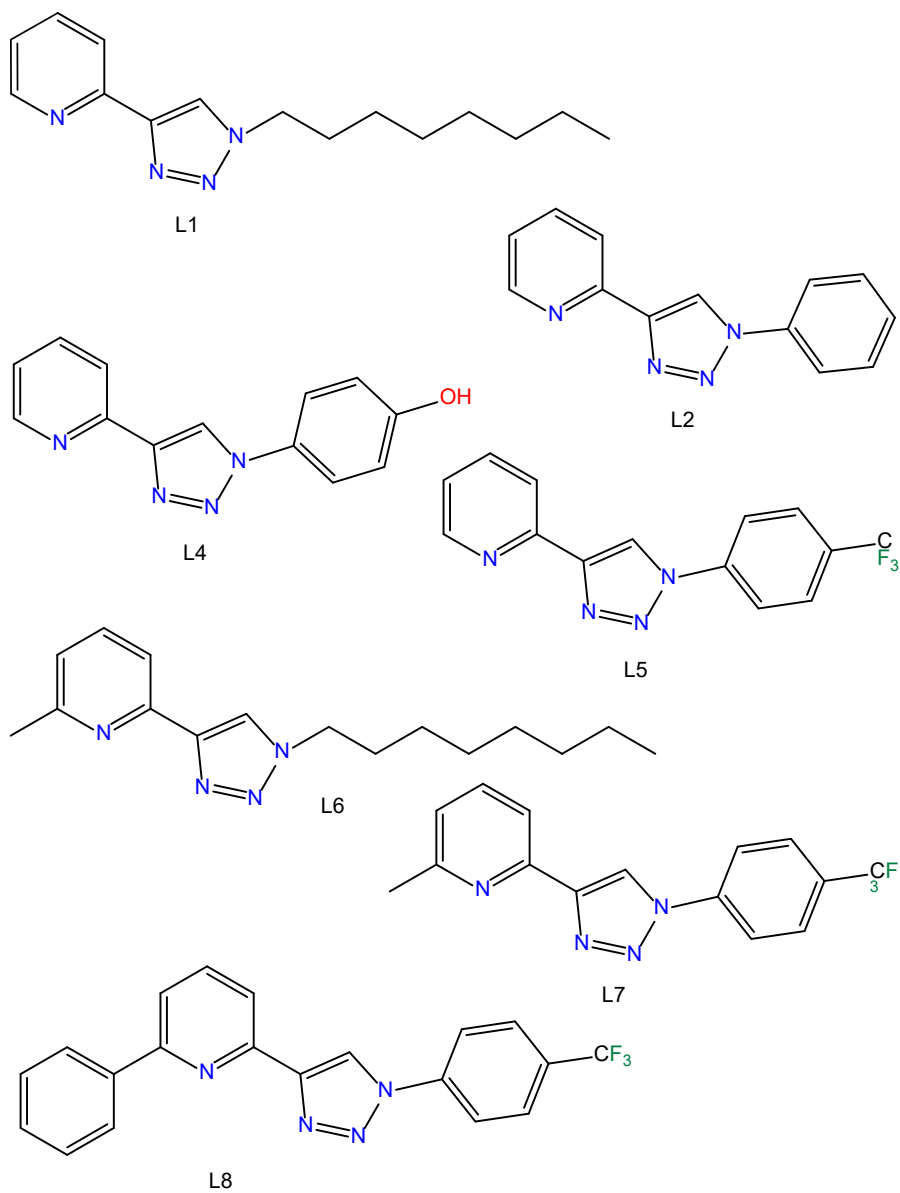

Figure S1: Structures of the tested ligands. (Ligand L3 was not available anymore)
